# Supplementary material for: A novel nitrogen rich porous aromatic framework for hydrogen and carbon dioxide storage
Source: Royal Society of Chemistry journal article supplement (doi:10.1039/c3ta13194g), 2013-01-01
Supplement: c3ta13194g.pdf [file c3ta13194g.pdf]

## *Supporting Information*

### **A novel nitrogen rich porous aromatic framework for hydrogen and carbon dioxide storage**

Derviş Emre Demirocak,<sup>\*1</sup> Manoj K. Ram,<sup>1</sup> Sessa S. Srinivasan,<sup>2,1</sup> D. Yogi Goswami,<sup>1</sup> and Elias K. Stefanakos<sup>1</sup>

<sup>1</sup> Clean Energy Research Center, College of Engineering, University of South Florida, Tampa, FL, 33620, USA

<sup>2</sup> Department of Physics, College of Arts and Sciences, Tuskegee University, Tuskegee, AL, 36088, USA

**\*Corresponding Author:** Derviş Emre Demirocak, E-mail: demirocak@mail.usf.edu, Tel: +1 813 4096864, Fax: +1 813 9742050

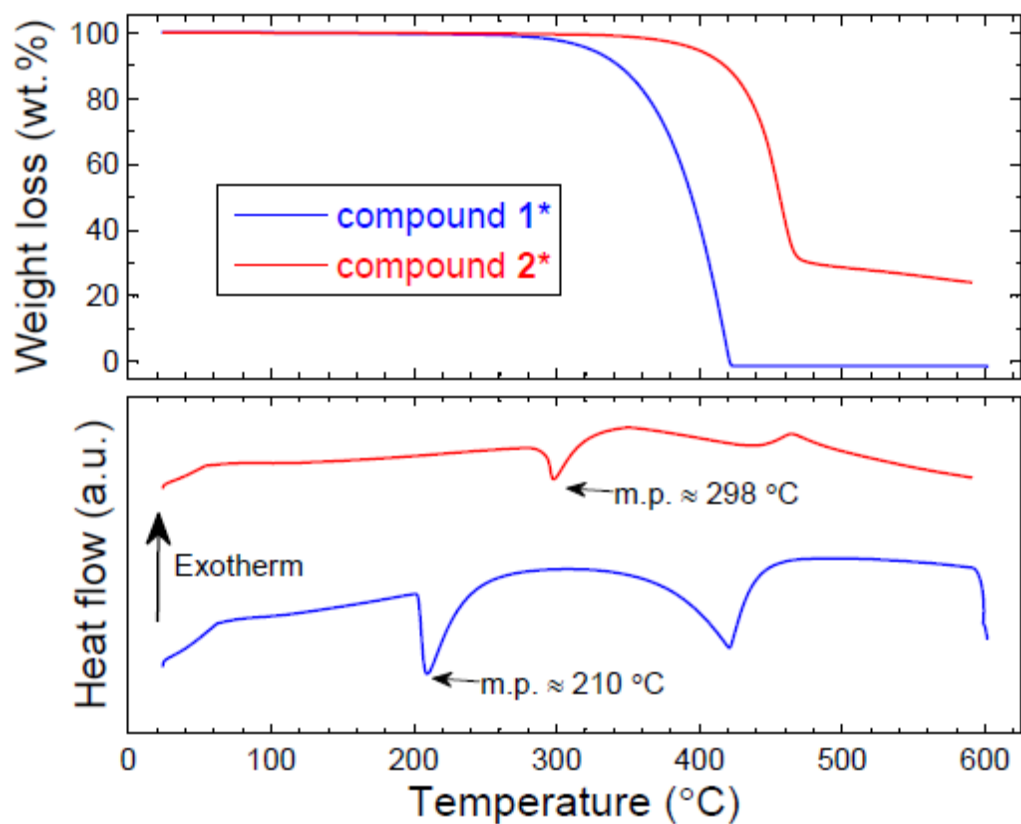

Fig. S1. TGA and DSC of the compounds 1 and 2. \* Refer to Fig. 1 for chemical structure.

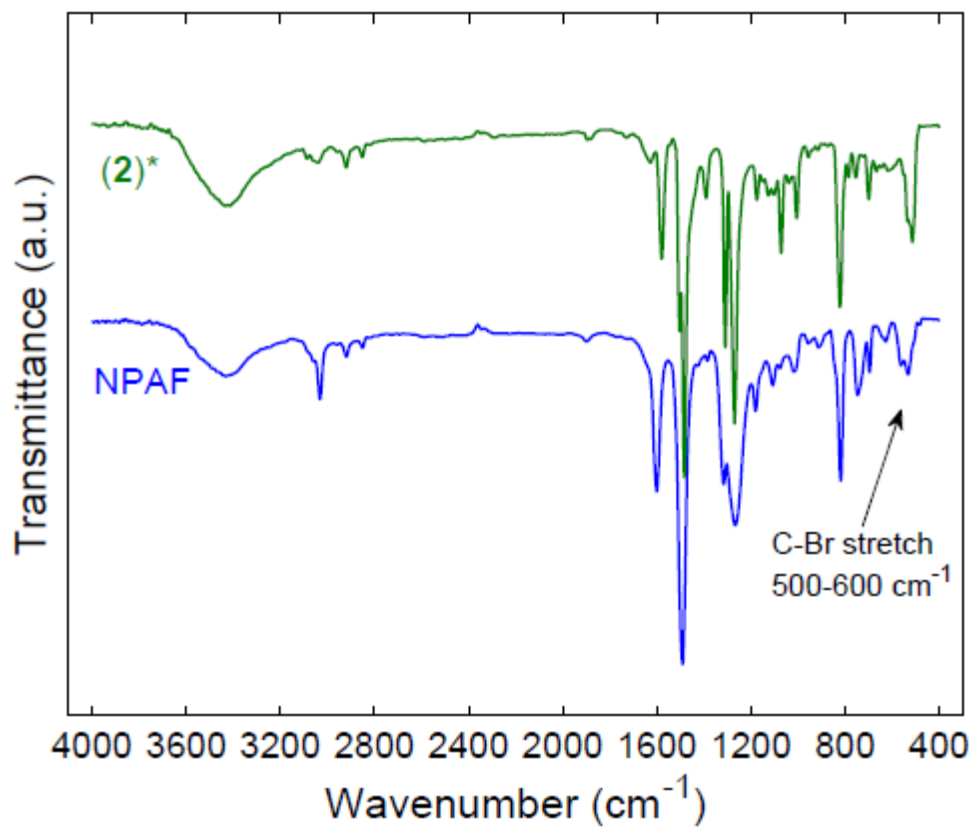

Fig. S2. FTIR of NPAF and compound **2** (building block of the NPAF). \* Refer to Scheme 1 for chemical structure.

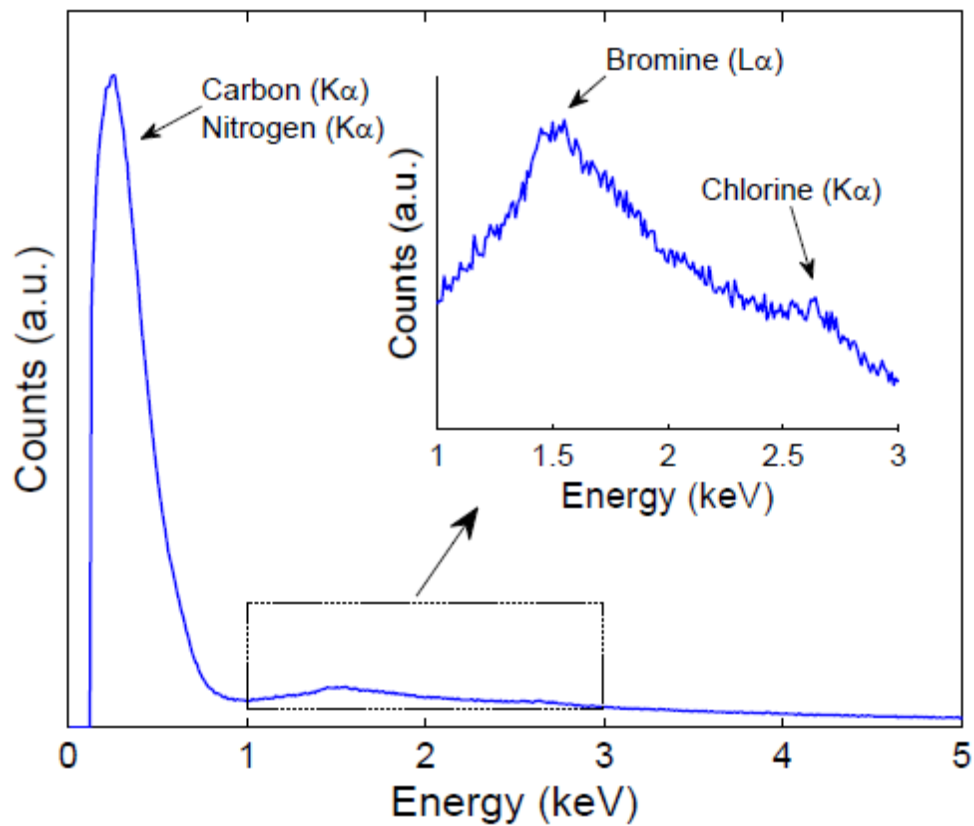

Fig. S3. SEM-EDX analysis of NPAF.

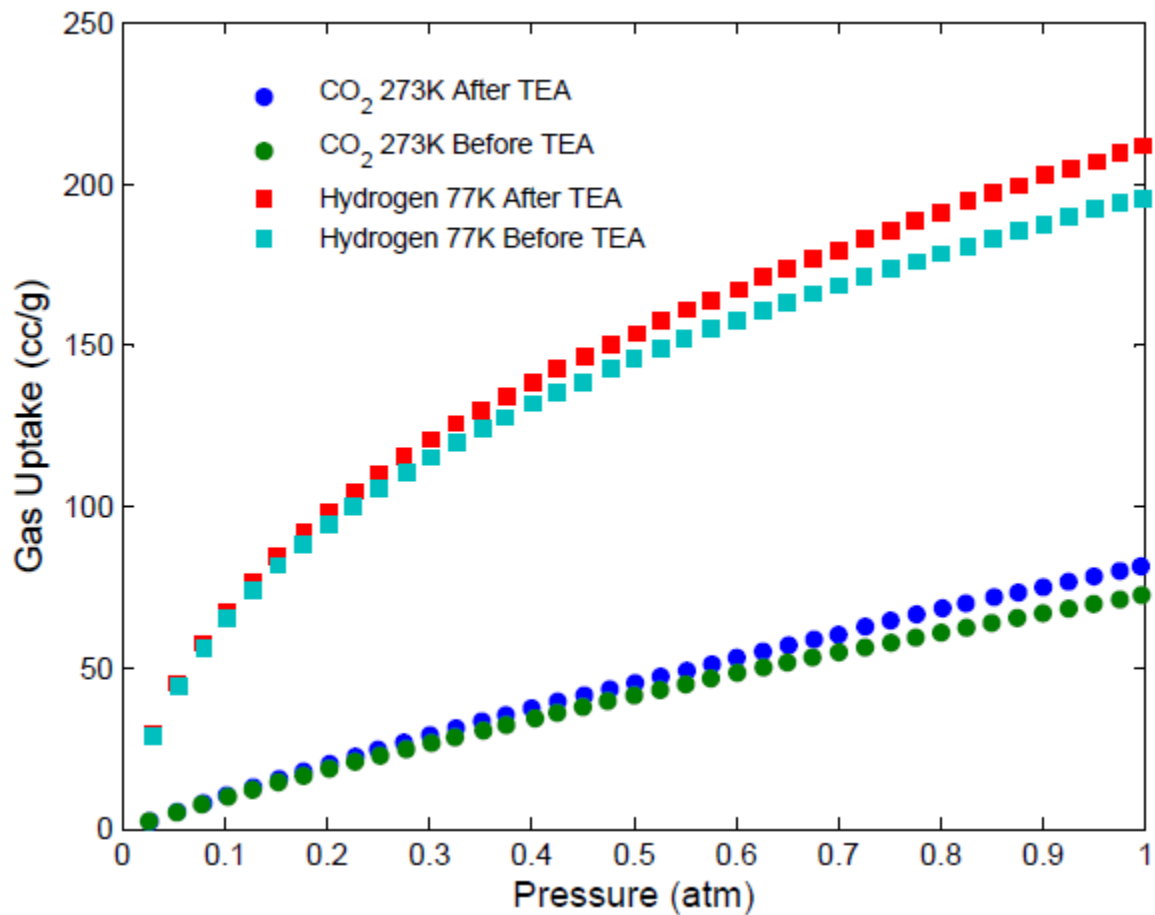

Fig. S4. Effect of triethanolamine (TEA) treatment on hydrogen and CO<sub>2</sub> uptakes of NPAF.

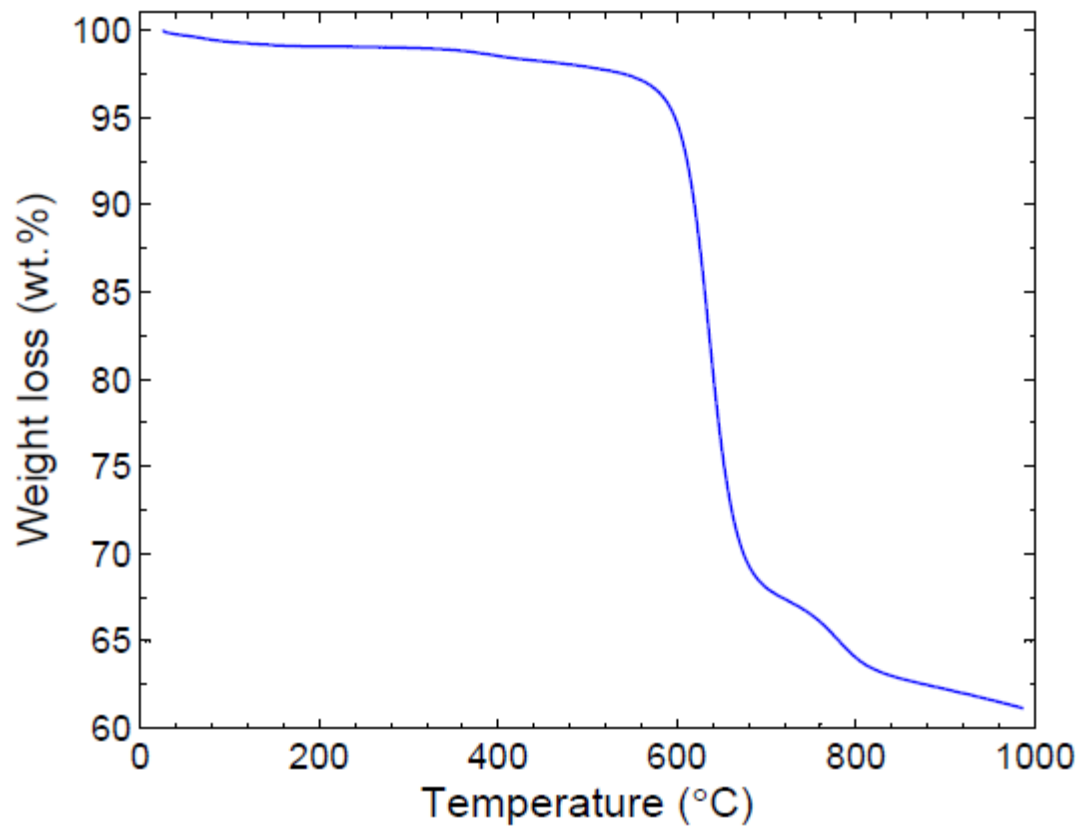

Fig. S5. TGA of NPAF under 100 ml/min nitrogen flow and 20 K/min ramping rate.

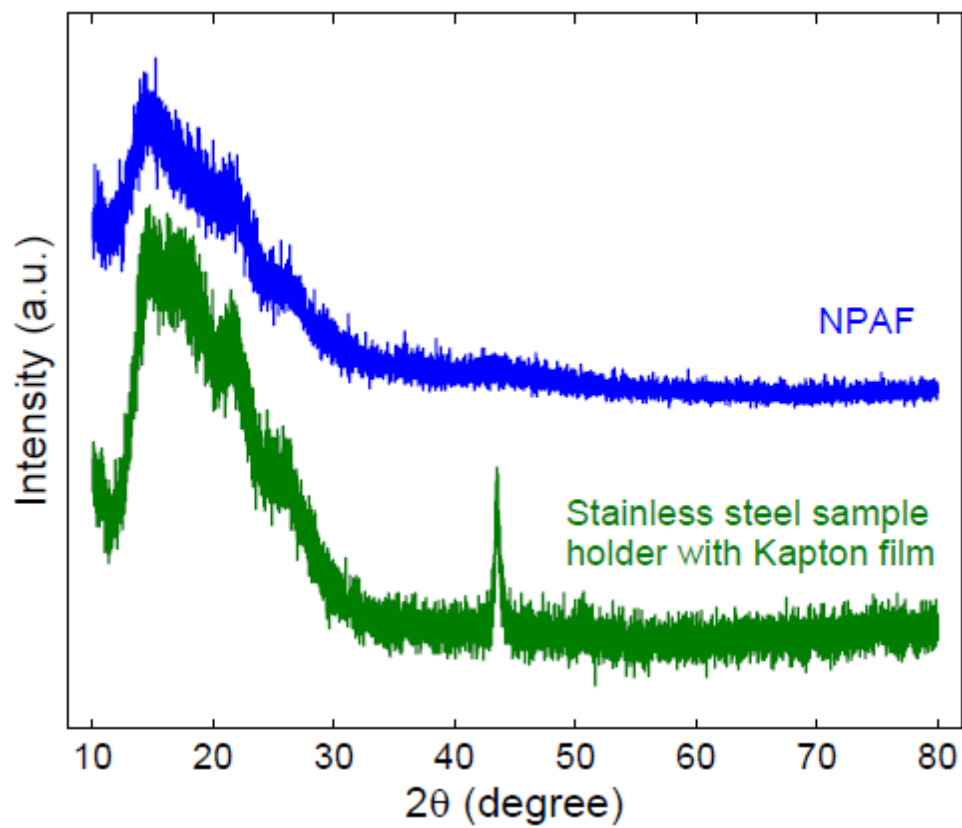

Fig. S6. XRD spectrum of NPAF.

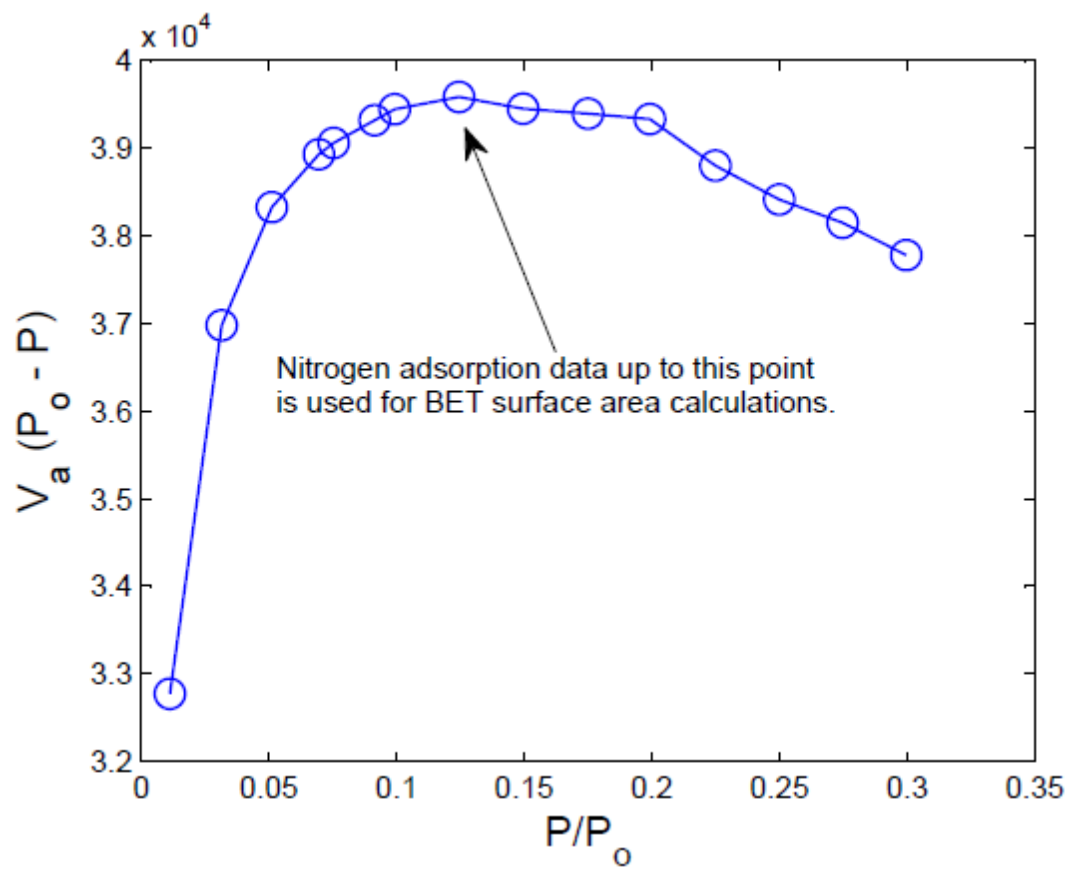

Fig. S7. Plot of the term  $V_a (P_o - P)$  vs.  $P/P_o$  for BET consistency analysis.



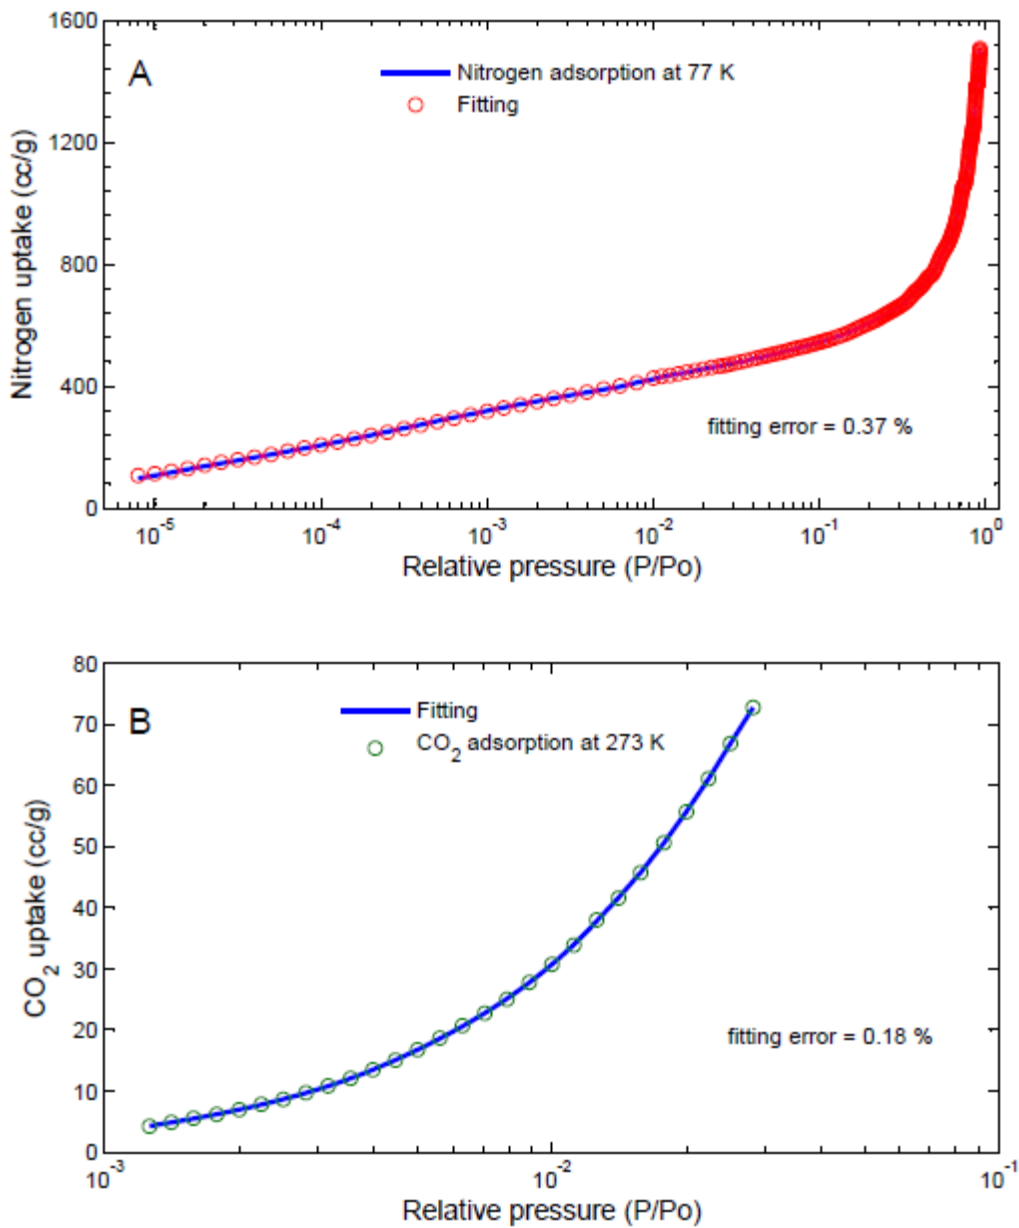

Fig. S8. Nitrogen and CO<sub>2</sub> adsorption isotherms and fittings to experimental data. Nitrogen and CO<sub>2</sub> adsorption isotherms were fitted by using hybrid and slit pore geometry, respectively.

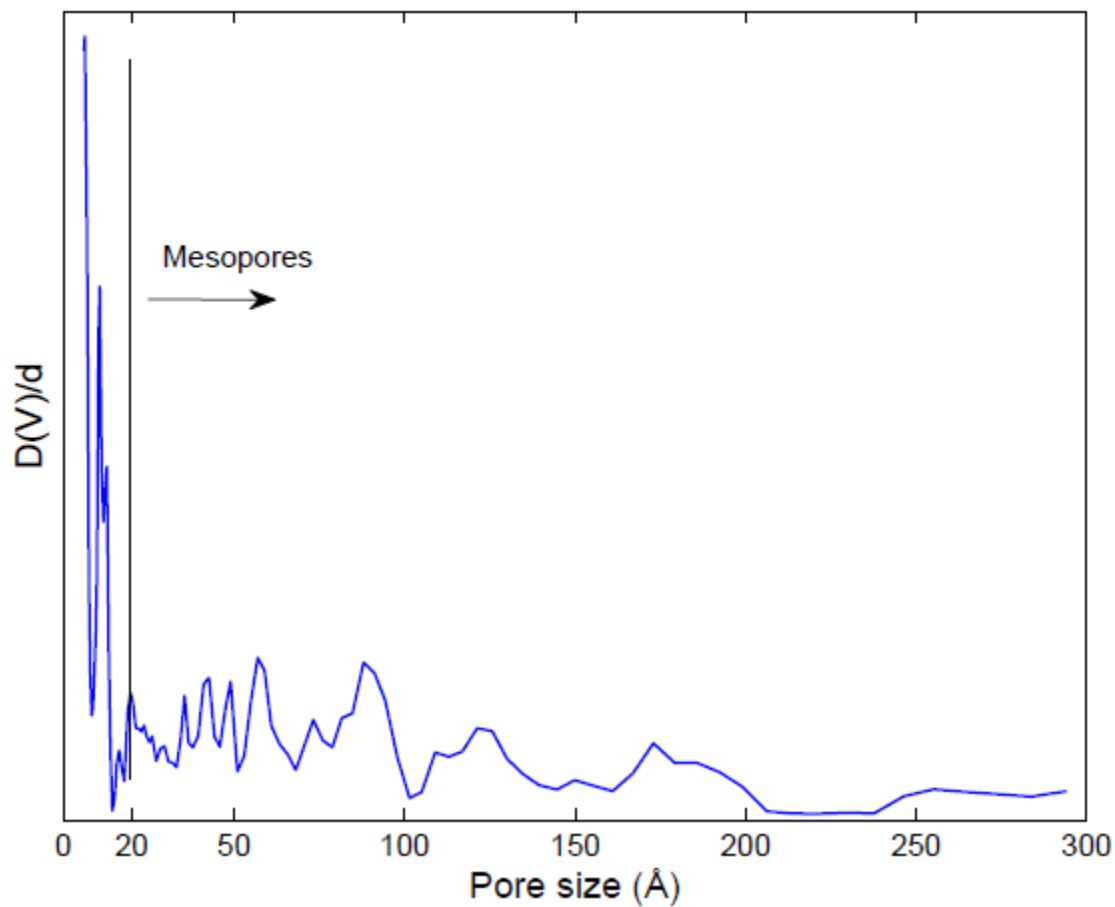

Fig. S9. Micropore and mesopore size distribution of NPAF. Left of the dash line represents the micropores ( $< 20 \text{ \AA}$ ) and right of the dash line represents mesopores ( $20 - 500 \text{ \AA}$ ).

Table S1. The CO<sub>2</sub> and hydrogen uptake values of porous polymers reported in the literature.

| Materials                             | S <sub>BET</sub><br>(m <sup>2</sup> /g) | CO <sub>2</sub> uptake at 1 atm <sup>1</sup><br>(mmol/g) |                                         | H <sub>2</sub> uptake at<br>77 K / 1 atm <sup>1</sup><br>(wt. %) | Ref.      |
|---------------------------------------|-----------------------------------------|----------------------------------------------------------|-----------------------------------------|------------------------------------------------------------------|-----------|
|                                       |                                         | 273 K                                                    | 298 K                                   |                                                                  |           |
| NPAF                                  | 1790                                    | 3.64<br>31.1 <sup>2</sup>                                | 2.32<br>28.7 <sup>3</sup>               | 1.87<br>0.33 <sup>4</sup>                                        | This work |
| POP-diimide                           | 960                                     | 4.02 <sup>5</sup>                                        | 2 <sup>6</sup>                          | –                                                                | 1         |
| BILP-1                                | 1172                                    | 4.27 <sup>7</sup>                                        | 2.98 <sup>5</sup>                       | 1.86 <sup>8</sup>                                                | 2         |
| BLP-1(H)                              | 1360                                    | 1.68                                                     | 0.94 <sup>5</sup>                       | 1.33                                                             | 3         |
| BLP-12(H)                             | 2244                                    | 2.91                                                     | 1.79 <sup>5</sup>                       | 1.93                                                             | 3         |
| PPN-4                                 | 6461                                    | –                                                        | 38.5 <sup>9</sup>                       | –                                                                | 4         |
| PPN-6                                 | 4023                                    | 1.98 <sup>10</sup>                                       | 1.5 <sup>8</sup>                        | –                                                                | 5         |
| PPN-6-SO <sub>3</sub> H               | 1254                                    | 4.98 <sup>7</sup>                                        | 3.6 <sup>8</sup>                        | –                                                                | 5         |
| PPN-6-SO <sub>3</sub> Li              | 1186                                    | 5.08 <sup>7</sup>                                        | 3.7 <sup>11</sup>                       | –                                                                | 5         |
| Compound 6 <sup>9</sup>               | –                                       | –                                                        | 0.2 <sup>12</sup>                       | –                                                                | 6         |
| Compound 3 <sup>9</sup>               | 1566                                    | 2.1 <sup>13</sup>                                        | –                                       | 1.1                                                              | 7         |
| POF1B                                 | 917                                     | 4.2 <sup>14</sup>                                        | 2.1 <sup>15</sup>                       | 1.25                                                             | 8         |
| HCP 1                                 | 1646                                    | –                                                        | 1.7 <sup>16</sup>                       | –                                                                | 9         |
| JUC-Z2                                | 2034                                    | 3.2                                                      | 1.6<br>13.2 <sup>17</sup>               | 1.62                                                             | 10<br>11  |
| BILP-4                                | 1135                                    | 5.3 <sup>18</sup>                                        | 3.6 <sup>18</sup>                       | 2.25                                                             | 12        |
| TFM-1                                 | 738                                     | 1.73                                                     | 0.93 <sup>18</sup>                      | –                                                                | 13        |
| BILP-10                               | 787                                     | 4.0                                                      | 2.5 <sup>18</sup><br>12.4 <sup>19</sup> | 1.6                                                              | 14        |
| 4C                                    | 1266                                    | –                                                        | 2.28 <sup>18</sup>                      | –                                                                | 15        |
| Fe-POP-1                              | 875                                     | 4.30                                                     | –                                       | –                                                                | 16        |
| PIM-1                                 | 899                                     | 2.53 <sup>18</sup>                                       | 1.41 <sup>18</sup>                      | –                                                                | 17        |
| Amidoxime-PIM-1                       | 577                                     | 2.74 <sup>18</sup>                                       | 1.65 <sup>18</sup>                      | –                                                                | 17        |
| BLP-10(Cl)                            | 924                                     | 2.7                                                      | 1.41                                    | 1.3                                                              | 18        |
| BILP-3                                | 1306                                    | 5.1 <sup>18</sup>                                        | 3.3 <sup>18</sup>                       | 2.1                                                              | 19        |
| COP-1                                 | 168                                     | –                                                        | 1.36 <sup>18</sup>                      | –                                                                | 20        |
| PAF-1                                 | 5300                                    | 2.06                                                     | –                                       | 1.6                                                              | 21        |
| Ni-Por-1                              | 1711                                    | 3.13 <sup>20</sup>                                       | –                                       | –                                                                | 22        |
| PAF-18-OH                             | 1121                                    | 2.57 <sup>18</sup>                                       | 1.52 <sup>18</sup>                      | 1.35                                                             | 23        |
| PAF-18-OH-Li                          | 981                                     | 3.29 <sup>18</sup>                                       | 2.02 <sup>18</sup>                      | 1.65                                                             | 23        |
| PAF-1-CH <sub>2</sub> NH <sub>2</sub> | 1363                                    | 4.38                                                     | –                                       | –                                                                | 24        |
| MOP A-B2                              | 614                                     | 2.71                                                     | 1.90 <sup>21</sup>                      | –                                                                | 25        |
| TPI-1                                 | 809                                     | 2.45                                                     | 1.25                                    | –                                                                | 26        |

<sup>1</sup> Unless otherwise noted, CO<sub>2</sub> uptake was reported at 1 atm. High pressure data, where available, highlighted in red.

<sup>2</sup> At 34.7 bar

<sup>3</sup> At 57.2 bar

<sup>4</sup> At 298 K and 80 bar

<sup>5</sup> CO<sub>2</sub> uptake at 273 K / 1 atm was not reported explicitly. The value given in the table is calculated by interpolation from the figure.

<sup>6</sup> CO<sub>2</sub> uptake at 298 K / 1 atm was not reported explicitly. The value given in the table is calculated by interpolation from the figure.

<sup>7</sup> Reported values were in mg/g unit. 188 mg/g and 131 mg/g at 273 K and 298 K, respectively.

<sup>8</sup> Reported value was 19 mg/g at 77 K. Converted to wt.% by using the equation [mass hyd / (mass hyd + mass sample)].

<sup>9</sup> At 295 K and 50 bar.

<sup>10</sup> CO<sub>2</sub> uptake at 273 K / 1 atm was not reported explicitly. The value given in the table is calculated by interpolation from the figure.

<sup>11</sup> At 295 K.

<sup>12</sup> At 293 K and 1 bar

<sup>13</sup> At 1 bar

<sup>14</sup> At 1 bar

<sup>15</sup> At 1 bar. The value given in the table is calculated by interpolation from the figure.

<sup>16</sup> At 1 bar

<sup>17</sup> At 18 bar

<sup>18</sup> The value given in the table is calculated by interpolation from the figure.

<sup>19</sup> At 40 bar.

<sup>20</sup> At 1.08 bar

<sup>21</sup> At 293K / 1 atm

Dual site Langmuir Freundlich (DSLFF) equation is given in Eq. S1.<sup>27</sup>

$$q = \frac{q_{sat,A} b_A p^{\alpha_A}}{1 + b_A p^{\alpha_A}} + \frac{q_{sat,B} b_B p^{\alpha_B}}{1 + b_B p^{\alpha_B}} \quad (S1)$$

where  $q$  is the amount of gas adsorbed (mmol/g),  $p$  is the pressure (bar),  $q_{sat}$  is the saturation capacity (mmol/g),  $b$  is the Langmuir-Freundlich parameter ( $\text{bar}^{-\alpha}$ ) and  $\alpha$  is the dimensionless Langmuir-Freundlich exponent for two adsorption sites A and B.

DSLFF fitting parameters were calculated by Igor Pro software using curve fitting toolbar.

Table S2. DSLFF fitting parameters for hydrogen, carbon dioxide and nitrogen adsorption isotherms given in Figs. S10, S11 and S12, respectively.

| DSLFF parameters | Hydrogen |         | Carbon dioxide |         | Nitrogen |         |
|------------------|----------|---------|----------------|---------|----------|---------|
|                  | 77 K     | 87 K    | 273 K          | 298 K   | 273 K    | 298 K   |
| $q_{sat,A}$      | 153.54   | 107.37  | 15.992         | 120.9   | 18.606   | 2.6122  |
| $q_{sat,B}$      | 321.88   | 274.82  | 160.04         | 47.811  | 9.814    | 3.2054  |
| $b_A$            | 4.7669   | 3.7793  | 1.7692         | 0.22016 | 0.21909  | 0.95116 |
| $b_B$            | 0.41514  | 0.33141 | 0.80414        | 1.7901  | 1.8447   | 1.9993  |
| $\alpha_A$       | 0.90285  | 1.0114  | 4.6664         | 2.0961  | 2.9267   | 2.9875  |
| $\alpha_B$       | 1.3682   | 1.4997  | 1.074          | 1.1917  | 1.2737   | 1.2322  |

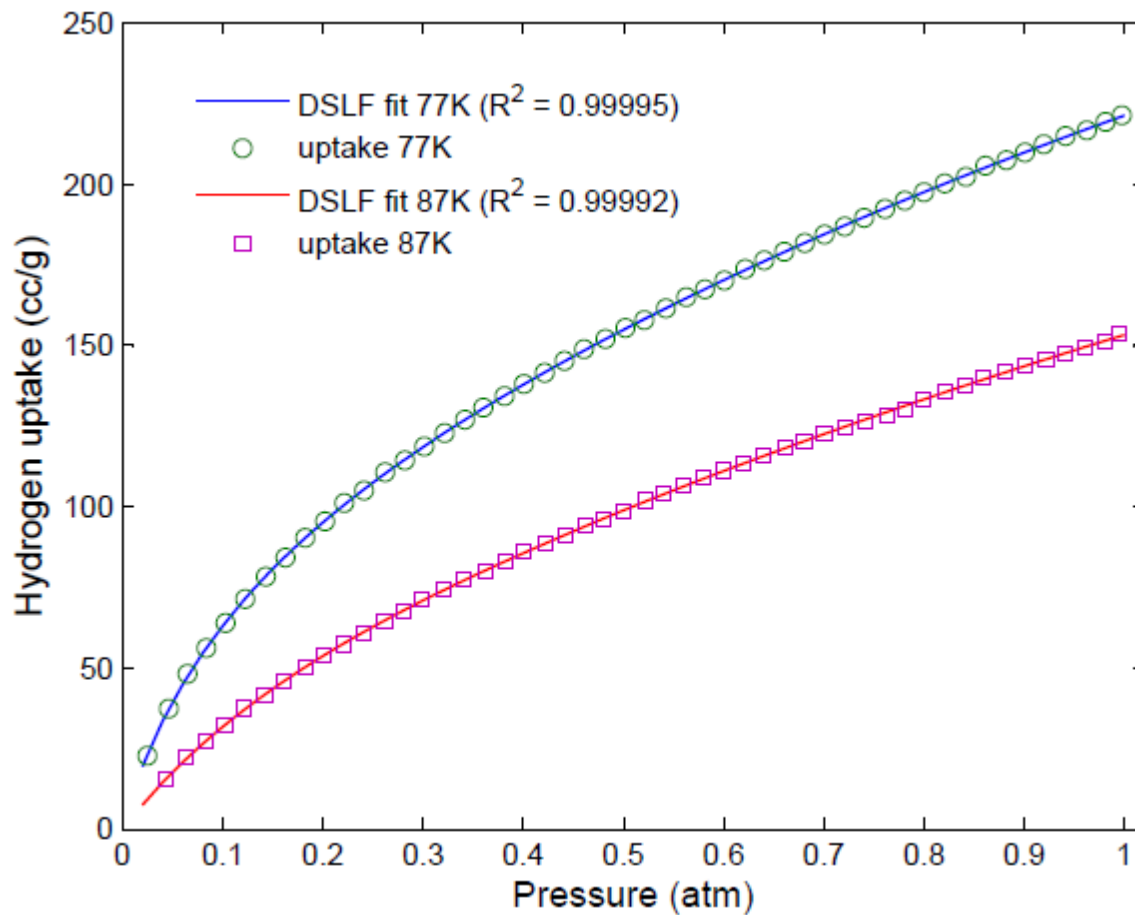

Fig. S10. Dual site Langmuir Freundlich (DSLFF) fits to hydrogen uptake at 77 K and 87 K.

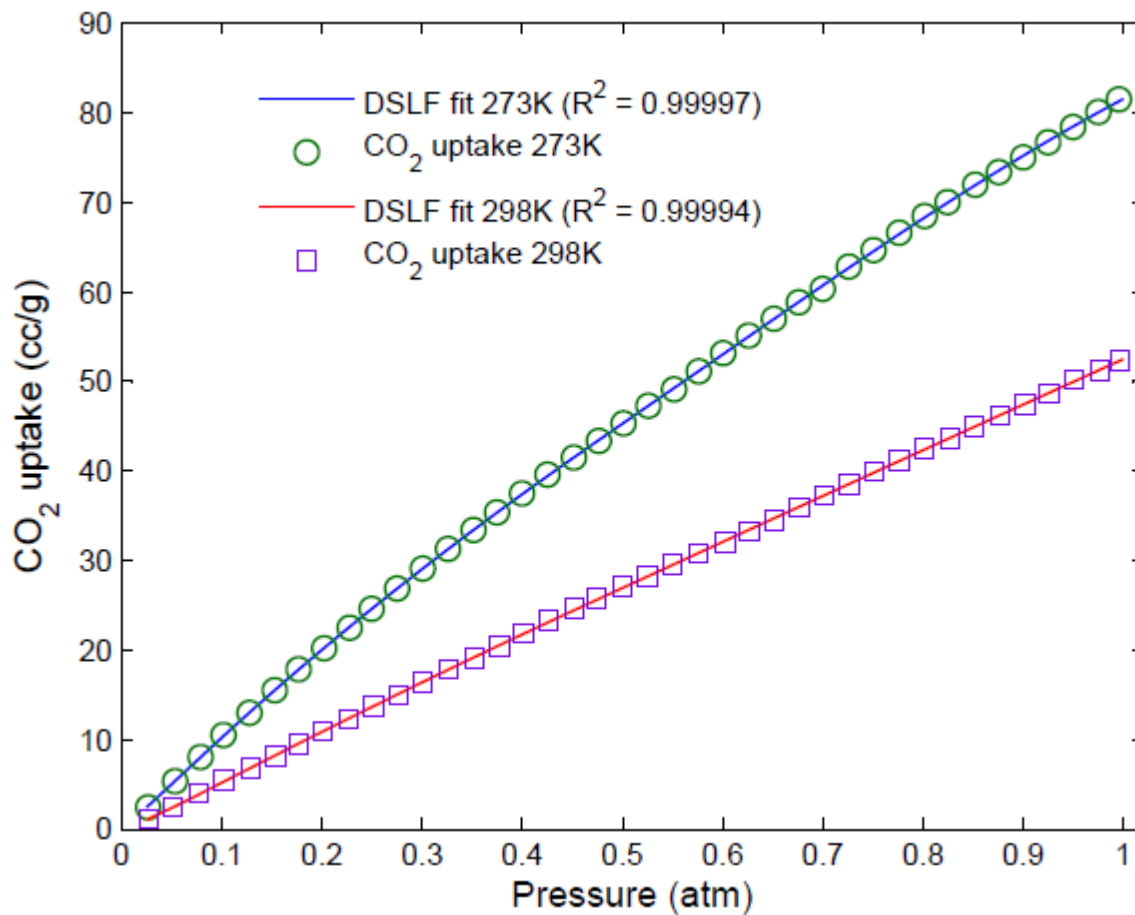

Fig. S11. Dual site Langmuir Freundlich (DSLFL) fits to the CO<sub>2</sub> adsorption data at 273 K and 298 K.

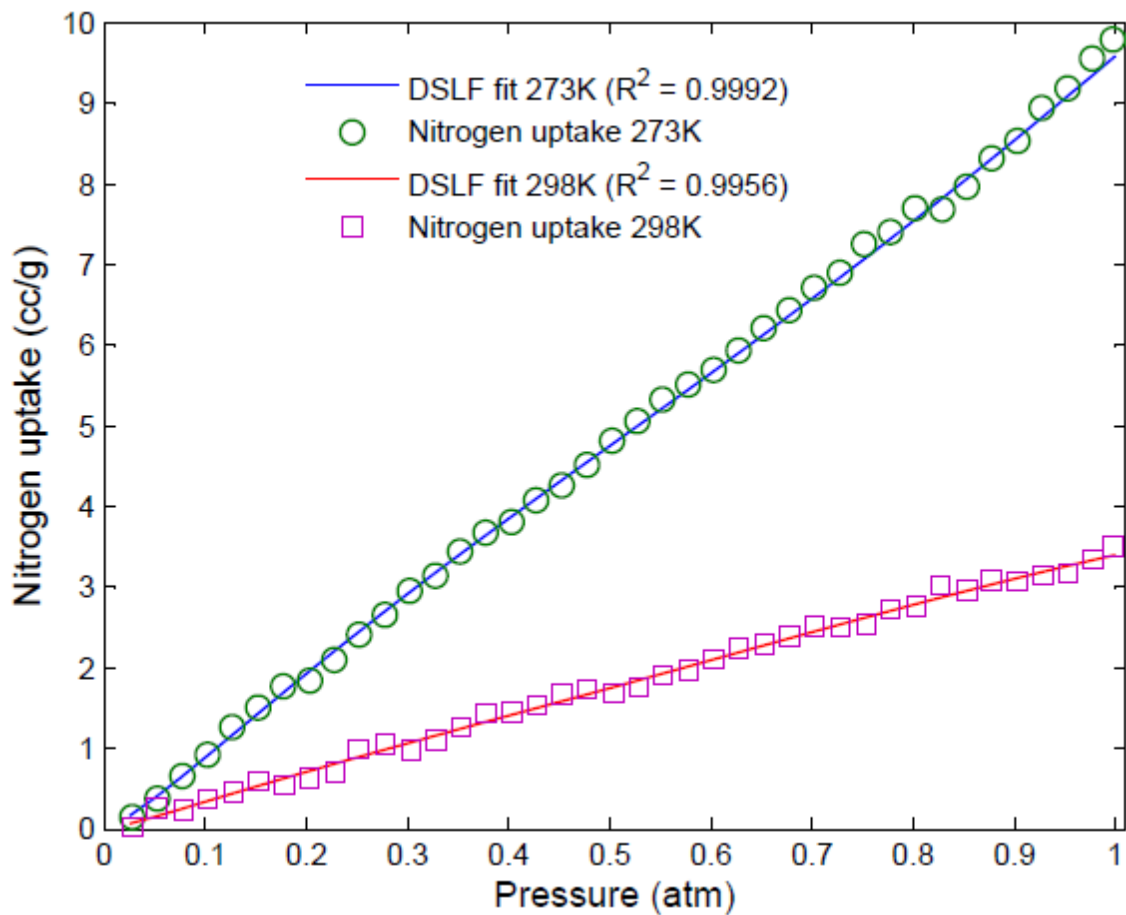

Fig. S12. Dual site Langmuir Freundlich fits to the nitrogen adsorption data at 273 K and 298 K.



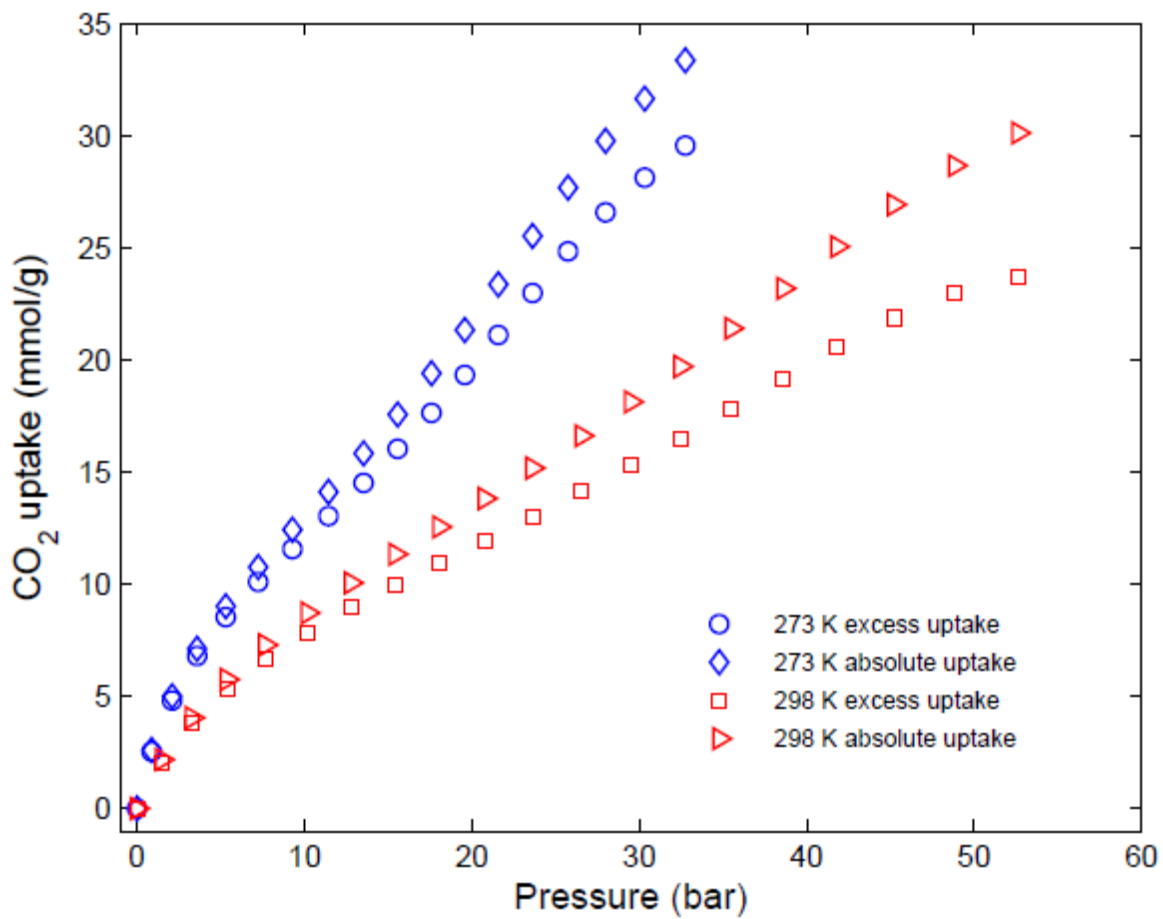

Fig. S13. Absolute and excess CO<sub>2</sub> gravimetric capacities of NPAF at 273 K and 298 K.

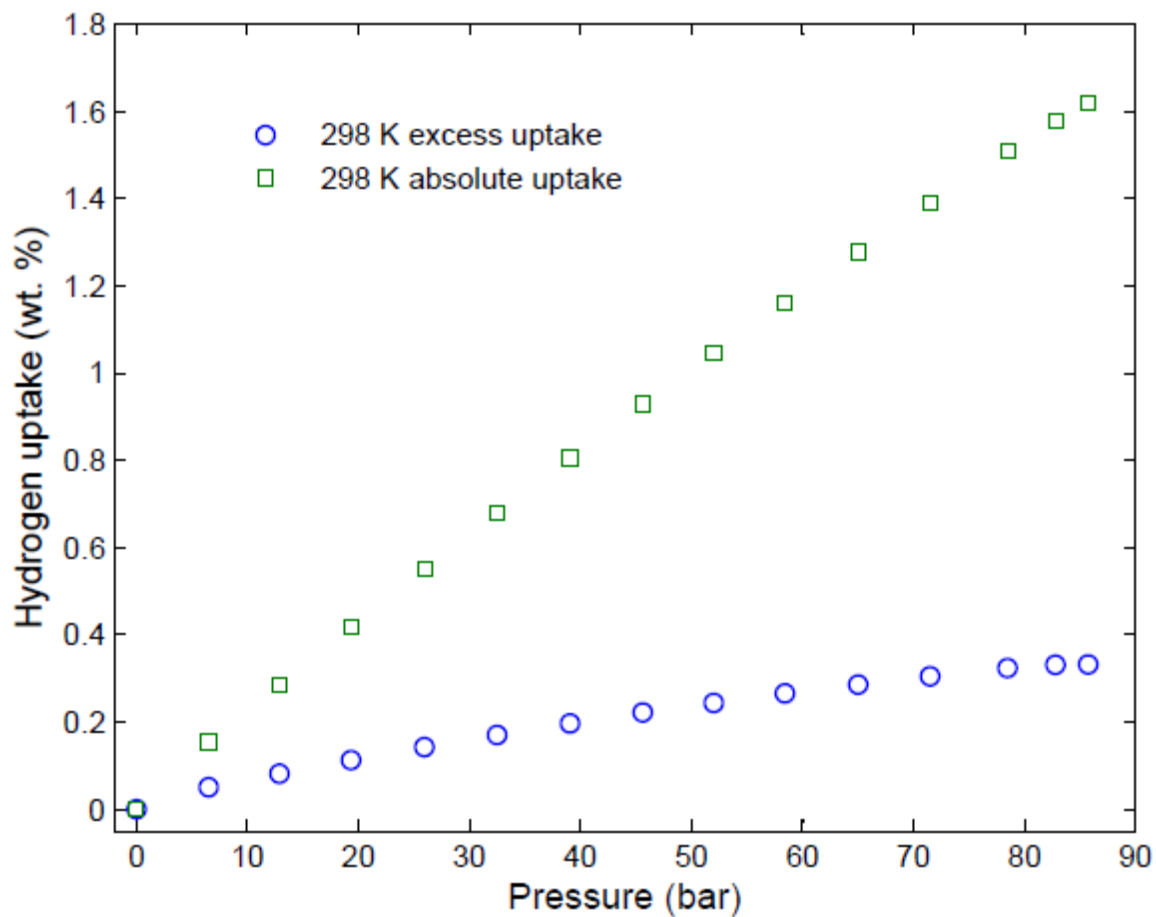

Fig. S14. Absolute and excess hydrogen gravimetric capacities of NPAF at 298 K.

## References

1. O. K. Farha, Y.-S. Bae, B. G. Hauser, A. M. Spokoyny, R. Q. Snurr, C. A. Mirkin and J. T. Hupp, *Chem. Commun.*, 2010, **46**, 1056-1058.
2. M. G. Rabbani and H. M. El-Kaderi, *Chem. Mater.*, 2011, **23**, 1650-1653.
3. K. T. Jackson, M. G. Rabbani, T. E. Reich and H. M. El-Kaderi, *Polym. Chem.*, 2011, **2**, 2775-2777.
4. D. Yuan, W. Lu, D. Zhao and H. C. Zhou, *Adv. Mater.*, 2011, **23**, 3723-3725.
5. W. Lu, D. Yuan, J. Sculley, D. Zhao, R. Krishna and H.-C. Zhou, *JACS*, 2011, **133**, 18126-18129.
6. Y. Jin, B. A. Voss, R. D. Noble and W. Zhang, *Angew. Chem.*, 2010, **122**, 6492-6495.
7. M. Mastalerz, M. W. Schneider, I. M. Oppel and O. Presly, *Angew. Chem. Int. Ed.*, 2011, **50**, 1046-1051.
8. A. P. Katsoulidis and M. G. Kanatzidis, *Chem. Mater.*, 2011, **23**, 1818-1824.
9. C. F. Martín, E. Stöckel, R. Clowes, D. J. Adams, A. I. Cooper, J. J. Pis, F. Rubiera and C. Pevida, *J. Mater. Chem.*, 2011, **21**, 5475-5483.
10. C. Pei, T. Ben, Y. Cui and S. Qiu, *Adsorption*, 2012, **18**, 375-380.
11. Z. Xiang, X. Zhou, C. Zhou, S. Zhong, X. He, C. Qin and D. Cao, *J. Mater. Chem.*, 2012, **22**, 22663-22669.
12. M. G. Rabbani and H. M. El-Kaderi, *Chem. Mater.*, 2012, **24**, 1511-1517.
13. X. Zhu, C. Tian, S. M. Mahurin, S.-H. Chai, C. Wang, S. Brown, G. M. Veith, H. Luo, H. Liu and S. Dai, *JACS*, 2012, **134**, 10478-10484.
14. M. G. Rabbani, A. K. Sekizkardes, O. M. El-Kadri, B. R. Kaafarani and H. M. El-Kaderi, *J. Mater. Chem.*, 2012, **22**, 25409-25417.
15. H. Lim, M. C. Cha and J. Y. Chang, *Macromol. Chem. Phys.*, 2012, **213**, 1385-1390.
16. A. Modak, M. Nandi, J. Mondal and A. Bhaumik, *Chem. Commun.*, 2012, **48**, 248-250.
17. H. A. Patel and C. Yavuz, *Chem. Commun.*, 2012.
18. T. E. Reich, S. Behera, K. T. Jackson, P. Jena and H. M. El-Kaderi, *J. Mater. Chem.*, 2012, **22**, 13524-13528.
19. M. G. Rabbani, T. E. Reich, R. M. Kassab, K. T. Jackson and H. M. El-Kaderi, *Chem. Commun.*, 2012, **48**, 1141-1143.
20. H. A. Patel, F. Karadas, A. Canlier, J. Park, E. Deniz, Y. Jung, M. Atilhan and C. T. Yavuz, *J. Mater. Chem.*, 2012, **22**, 8431-8437.
21. T. Ben, Y. Li, L. Zhu, D. Zhang, D. Cao, Z. Xiang, X. Yao and S. Qiu, *Energy Environ. Sci.*, 2012.
22. Z. Wang, S. Yuan, A. Mason, B. Reprogle, D.-J. Liu and L. Yu, *Macromolecules*, 2012.
23. H. Ma, H. Ren, X. Zou, F. Sun, Z. Yan, K. Cai, D. Wang and G. Zhu, *J. Mater. Chem. A*, 2013, **1**, 752-758.
24. S. J. Garibay, M. H. Weston, J. E. Mondloch, Y. J. Colón, O. K. Farha, J. T. Hupp and S. T. Nguyen, *CrystEngComm*, 2013, **15**, 1515-1519.
25. C. Xu and N. Hedin, *J. Mater. Chem. A*, 2013, **1**, 3406-3414.
26. M. R. Liebl and J. Senker, *Chem. Mat.*
27. W. L. Queen, E. D. Bloch, C. M. Brown, M. R. Hudson, J. A. Mason, L. J. Murray, A. J. Ramirez-Cuesta, V. K. Peterson and J. R. Long, *Dalton Trans.*, 2012, **41**, 4180-4187.
